# Supplementary material for: Identifying research waste from surgical research: a protocol for assessing compliance with the IDEAL framework and recommendations
Source: PubMed Central journal article supplement — BMJ Surg Interv Health Technol. 2021 Feb 13;3(1):e000050. doi: 10.1136/bmjsit-2020-000050 (PMC8647616; doi:10.1136/bmjsit-2020-000050), 2021-02-13
Supplement: bmjsit-2020-000050supp001.pdf [file bmjsit-2020-000050supp001.pdf]

**Appendix 1 Search strategy**

| Step | Query                                                                                                                                                                                                                                                                                                                                                                                                                                                                                                      | Description                              |
|------|------------------------------------------------------------------------------------------------------------------------------------------------------------------------------------------------------------------------------------------------------------------------------------------------------------------------------------------------------------------------------------------------------------------------------------------------------------------------------------------------------------|------------------------------------------|
| #1   | Search (surgery[MeSH Terms]) OR surgical procedures, operative[MeSH Terms]                                                                                                                                                                                                                                                                                                                                                                                                                                 | MeSH search for "SURGICAL OPERATIONS"    |
| #2   | Search ((((((((((Surgical[Title/Abstract]) OR Operation[Title/Abstract]) OR operative[Title/Abstract]) OR operative therapy[Title/Abstract]) OR operative procedure[Title/Abstract]) OR invasive procedure[Title/Abstract]) OR peroperative procedure[Title/Abstract]) OR perioperative procedure[Title/Abstract]) OR preoperative procedure[Title/Abstract]) OR intraoperative procedure[Title/Abstract]) OR surgery[Title/Abstract]) OR procedure[Title/Abstract]) OR Surgical Procedure[Title/Abstract] | Keyword search for "SURGICAL OPERATIONS" |
| #3   | Search (equipment and supplies[MeSH Terms])                                                                                                                                                                                                                                                                                                                                                                                                                                                                | MeSH search for "THERAPEUTIC DEVICES"    |
| #4   | Search ((((((equipment[Title/Abstract]) OR supplies[Title/Abstract]) OR apparatus[Title/Abstract]) OR instrument[Title/Abstract]) OR inventor*[Title/Abstract]) OR Medical Device[Title/Abstract]) OR Device[Title/Abstract]                                                                                                                                                                                                                                                                               | Keyword search for "THERAPEUTIC DEVICES" |
| #5   | Search drug therapy[MeSH Terms]                                                                                                                                                                                                                                                                                                                                                                                                                                                                            | MeSH search for "DRUGS"                  |
| #6   | Search (((Drug Therap*[Title/Abstract]) OR Drug treatment[Title/Abstract]) OR Chemotherap*[Title/Abstract]) OR Pharmacotherap*[Title/Abstract]) OR pharmacologic[Title/Abstract]                                                                                                                                                                                                                                                                                                                           | Keyword search for "DRUGS"               |
| #7   | Search #1 OR #2                                                                                                                                                                                                                                                                                                                                                                                                                                                                                            |                                          |
| #8   | Search #3 OR #4                                                                                                                                                                                                                                                                                                                                                                                                                                                                                            |                                          |
| #9   | Search (#5) OR #6                                                                                                                                                                                                                                                                                                                                                                                                                                                                                          |                                          |
| #10  | Search #7 NOT #9                                                                                                                                                                                                                                                                                                                                                                                                                                                                                           |                                          |
| #11  | Search #8 NOT #9                                                                                                                                                                                                                                                                                                                                                                                                                                                                                           |                                          |
| #12  | "case control studies"[Mesh] OR "Cohort Studies"[Mesh] OR "Longitudinal Studies"[Mesh] OR "retrospective studies"[Mesh] OR "Follow-Up Studies"[ Mesh] OR "prospective studies" [Mesh] OR Cohort[tiab] OR case control[tiab] OR longitudinal[tiab] OR follow up[tiab] OR prospective*[tiab] OR retrospective*[tiab] OR nonrandom*[tiab] OR comparison group*[tiab] OR control group*[tiab] OR "Registries"[Mesh] OR registry[tiab] OR registries[tiab]                                                      | search for "NON-RANDOMIZED STUDY"        |
| #13  | Search (((("Case Reports" [Publication Type]) OR "Single-Case Studies as Topic"[Mesh])) OR ("case                                                                                                                                                                                                                                                                                                                                                                                                          | search for "CASE STUDY"                  |

|     |                                                                                                                                                                                                                                                                                                                                                                                                                                                                                                                                                                                                                                                                       |                                        |
|-----|-----------------------------------------------------------------------------------------------------------------------------------------------------------------------------------------------------------------------------------------------------------------------------------------------------------------------------------------------------------------------------------------------------------------------------------------------------------------------------------------------------------------------------------------------------------------------------------------------------------------------------------------------------------------------|----------------------------------------|
|     | report"[Title/Abstract] OR "case reports"[Title/Abstract])) OR "case series"[Title/Abstract] OR "case study") OR "case studies"[Title/Abstract]                                                                                                                                                                                                                                                                                                                                                                                                                                                                                                                       |                                        |
| #14 | (systematic review [ti] OR meta-analysis [pt] OR meta-analysis [ti] OR systematic literature review [ti] OR systematic review [tw] OR (systematic review [tiab] AND review [pt]) OR meta synthesis [ti] OR integrative review [tw] OR integrative research review [tw] OR rapid review [tw] OR consensus development conference [pt] OR practice guideline [pt] OR cochrane database syst rev [ta] OR acp journal club [ta] OR health technol assess [ta] OR evid rep technol assess summ [ta] OR drug class reviews [ti]) OR (clinical guideline [tw] AND management [tw]) OR meta analy*[ti] OR metaanaly*[ti] OR meta analysis[pt]                                 | Keyword search for "SYSTEMATIC REVIEW" |
| #15 | "Meta-Analysis as Topic"[Mesh] OR "Review Literature as topic"[Mesh]                                                                                                                                                                                                                                                                                                                                                                                                                                                                                                                                                                                                  | MeSH search for "SYSTEMATIC REVIEW"    |
| #16 | Search (((((((Clinical Conference [Publication Type] OR Comment [Publication Type] OR Congress [Publication Type] OR Editorial [Publication Type] OR Letter [Publication Type] OR Clinical Trial Protocol [Publication Type] OR Clinical Trial, Veterinary[Publication Type])) OR ((Conference[Title/Abstract] OR conferences[Title/Abstract])) OR ((Comment[Title/Abstract] OR comments[Title/Abstract])) OR Congress[Title/Abstract] OR Consensus[Title/Abstract] OR ((Editorial[Title/Abstract] OR editorials[Title/Abstract] OR Letter[Title/Abstract] OR Protocol[Title/Abstract] OR protocols[Title/Abstract])) OR Clinical Trial, Veterinary[Publication Type] | Search "EDITORIAL"                     |
| #17 | Search #12 OR #13                                                                                                                                                                                                                                                                                                                                                                                                                                                                                                                                                                                                                                                     |                                        |
| #18 | Search #14 OR #15 OR #16                                                                                                                                                                                                                                                                                                                                                                                                                                                                                                                                                                                                                                              |                                        |
| #19 | Search #10 AND #17 NOT #18                                                                                                                                                                                                                                                                                                                                                                                                                                                                                                                                                                                                                                            | Surgical operation                     |
| #20 | Search #11 AND #17 NOT #18                                                                                                                                                                                                                                                                                                                                                                                                                                                                                                                                                                                                                                            | Therapeutic devices                    |
| #21 | Search English[Language]                                                                                                                                                                                                                                                                                                                                                                                                                                                                                                                                                                                                                                              |                                        |
| #22 | Search animals [Mesh]                                                                                                                                                                                                                                                                                                                                                                                                                                                                                                                                                                                                                                                 |                                        |
| #23 | Search humans [Mesh]                                                                                                                                                                                                                                                                                                                                                                                                                                                                                                                                                                                                                                                  |                                        |
| #24 | Search #22 NOT #23                                                                                                                                                                                                                                                                                                                                                                                                                                                                                                                                                                                                                                                    |                                        |
| #25 | Search ("2018/1/1"[Date - Publication] : "2018/12/31"[Date - Publication])                                                                                                                                                                                                                                                                                                                                                                                                                                                                                                                                                                                            |                                        |
| #26 | Search #19 AND #21 NOT #24                                                                                                                                                                                                                                                                                                                                                                                                                                                                                                                                                                                                                                            |                                        |
| #27 | Search #25 AND #26                                                                                                                                                                                                                                                                                                                                                                                                                                                                                                                                                                                                                                                    | Surgical operation                     |
| #28 | Search #20 AND #21 NOT #24                                                                                                                                                                                                                                                                                                                                                                                                                                                                                                                                                                                                                                            |                                        |
| #29 | Search #28 AND #26                                                                                                                                                                                                                                                                                                                                                                                                                                                                                                                                                                                                                                                    | Therapeutic devices                    |
